# Potential of Global Cropland Phytolith Carbon Sink from Optimization of Cropping System and Fertilization

Zhaoliang Song<sup>1,2,3\*</sup>, Jeffrey F. Parr<sup>4</sup>, Fengshan Guo<sup>2</sup>

**1** Zhejiang Provincial Key Laboratory of C Cycling in Forest Ecosystems and C Sequestration, Zhejiang Agricultural and Forestry University, Lin'an, Zhejiang, China, **2** School of Environment and Resources, Zhejiang Agricultural and Forestry University, Lin'an, Zhejiang, China, **3** State Key Laboratory of Environmental Geochemistry, Institute of Geochemistry, Chinese Academy of Sciences, Guiyang, Guizhou, China, **4** Southern Cross GeoScience, Southern Cross University, Lismore, New South Wales, Australia

## Abstract

The occlusion of carbon (C) by phytoliths, the recalcitrant silicified structures deposited within plant tissues, is an important persistent C sink mechanism for croplands and other grass-dominated ecosystems. By constructing a silica content-phytolith content transfer function and calculating the magnitude of phytolith C sink in global croplands with relevant crop production data, this study investigated the present and potential of phytolith C sinks in global croplands and its contribution to the cropland C balance to understand the cropland C cycle and enhance long-term C sequestration in croplands. Our results indicate that the phytolith sink annually sequesters  $26.35 \pm 10.22$  Tg of carbon dioxide (CO<sub>2</sub>) and may contribute  $40 \pm 18\%$  of the global net cropland soil C sink for 1961–2100. Rice (25%), wheat (19%) and maize (23%) are the dominant contributing crop species to this phytolith C sink. Continentally, the main contributors are Asia (49%), North America (17%) and Europe (16%). The sink has tripled since 1961, mainly due to fertilizer application and irrigation. Cropland phytolith C sinks may be further enhanced by adopting cropland management practices such as optimization of cropping system and fertilization.

**Citation:** Song Z, Parr JF, Guo F (2013) Potential of Global Cropland Phytolith Carbon Sink from Optimization of Cropping System and Fertilization. PLoS ONE 8(9): e73747. doi:10.1371/journal.pone.0073747

**Editor:** Senjie Lin, University of Connecticut, United States of America

**Received:** May 8, 2013; **Accepted:** July 25, 2013; **Published:** September 16, 2013

**Copyright:** © 2013 Song et al. This is an open-access article distributed under the terms of the Creative Commons Attribution License, which permits unrestricted use, distribution, and reproduction in any medium, provided the original author and source are credited.

**Funding:** The authors are grateful for support from the National Natural Science Foundation of China (Grant No. 41103042), the Zhejiang Province Key Science and Technology Innovation Team (No. 2010R50030), and the Opening Project of State Key Laboratory of Environmental Geochemistry (SKLEG9011). The funders had no role in study design, data collection and analysis, decision to publish, or preparation of the manuscript.

**Competing Interests:** The authors have declared that no competing interests exist.

\* E-mail: songzhaoliang78@163.com

## Introduction

Present understanding of the global carbon (C) cycle and climate feedbacks is limited by uncertainty over terrestrial C balance [1–5]. As one of the largest terrestrial ecosystems deeply influenced by human activities, the croplands cover an area of  $15.33 \times 10^8$  hm<sup>2</sup> globally and may play a significant role in terrestrial C balance [3,6]. Although croplands were traditionally considered to be the largest biospheric source of C lost to the atmosphere in most areas of the world [7–12], they may also be significant C sinks under proper management [3,6,13–15].

Phytolith-occluded C (PhytOC), where C is entrapped within recalcitrant silicified structures when they are deposited within plant tissues [16–18], is particularly prolific in many crops such as rice [19], wheat [20], millet [21] and sugarcane [22]. PhytOC is highly resistant against decomposition [18,23–25] and may accumulate in soil for several thousands of years after plant decomposition [18], demonstrating the potential of phytoliths in the long-term biogeochemical sequestration of atmospheric carbon dioxide (CO<sub>2</sub>) [5,26]. Soil PhytOC accumulation is an important persistent C sink mechanism for croplands [18–22] and other grass-dominated ecosystems [26,27]. Moreover, Jansson et al. [28] suggest that the production of PhytOC in croplands could be greatly enhanced through crop breeding. However, the present and potential of global cropland phytolith C sink have not been revealed.

In the present study, we quantified the present and potential of phytolith carbon sink and its contribution to the global cropland C balance by constructing a silica content-phytolith content transfer function and calculating the magnitude of the phytolith C sink in global croplands with relevant crop data including the PhytOC and silica content, farm crop output, the Si-rich organ ratio (mass ratios of the Si-rich organ: crop output) and the PhytOC stability factor. The purposes of the study are to guide the management of cropland ecosystems to maximize phytolith C sequestration and mitigate climate change.

## Materials and Methods

### Ethics Statements

No specific permits were required for the described field studies, because the experimental field is owned by Zhejiang Agricultural and Forestry University, and the School of Environment and Resources performs the management. No specific permits were required for these locations/activities, because the location is not privately-owned or protected in any way, the field studies did not involve endangered or protected species, and each sample consisted of no more than 500 grams (fresh weight).

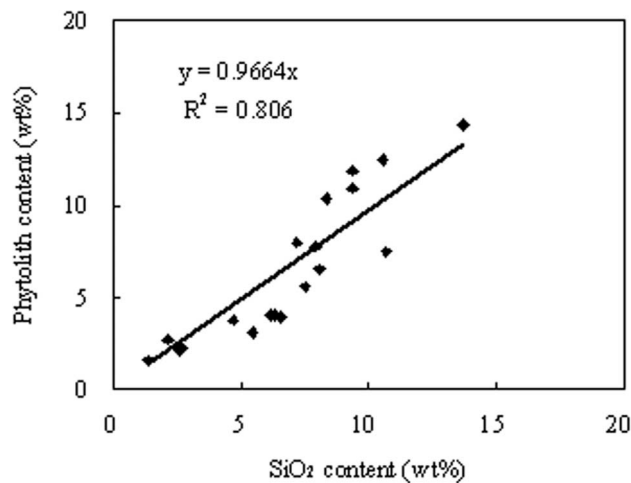

**Figure 1. The correlation of phytolith content (%) to SiO<sub>2</sub> (%) content in different crop species (p<0.01).**  
doi:10.1371/journal.pone.0073747.g001

### Constructing the Transfer Function for the Phytolith:Silica Content

Plant phytolith content may be estimated from plant silica content data using the transfer function for the phytolith:silica content [26]. To construct the silica content- phytolith content transfer function, mature crop organ samples were collected—each sample consisted of approximately 500 g of composite plant material.

Plant samples were oven-dried at 65°C to a constant mass and cut into small pieces (<5 mm). They were ashed at 500°C to remove organic matter, fused with lithium metaborate, dissolved in dilute nitric acid and analyzed for silica content using inductively coupled plasma-optical emission spectroscopy (ICP-OES; Optima 7000 DV, Perkin Elmer, Massachusetts, USA). Plant phytoliths were isolated using a microwave digestion process followed by a Walkley–Black type digestion to ensure the removal of extraneous organic material [19,27]. The isolated phytoliths were dried to a constant mass at 75°C for 24 h in a fan-forced oven and weighed to determine the plant phytolith content. The occluded-C content within phytoliths was also determined [19,27]. The error was <5% in phytolith and silica measurements and <10% in PhytOC measurements using plant standards (GSV-1) and triplicate analyses.

The plant silica content- phytolith content transfer function was constructed using regression analysis based on the phytolith and silica contents determined for the samples (Figure 1). Silica content was converted to phytolith content using the following equation ( $R^2 = 0.806$ ,  $p < 0.01$ ):

$$\text{Phytolith content (wt \%)} = 0.9664 \times \text{silica content (wt \%)} \quad (1)$$

### Data Collection, Phytolith and PhytOC Content Estimation

Farm productivity data was obtained from Food and Agriculture Organization of the United Nations (FAO) Statistics [29]. Silica content data was obtained from published monographs [30,31], papers [19–21,32,33] and also determined in the present study. Silica content of crop species was used to estimate phytolith content using a conversion factor of 0.9664; see equation (1). The

**Table 1. General information and PhytOC content of the dominant arable crops.**

| Farm crops        | Area (10 <sup>6</sup> hm <sup>2</sup> ) <sup>a</sup> | Plant Si-rich organs  | PhytOC (%) <sup>b</sup> |      |
|-------------------|------------------------------------------------------|-----------------------|-------------------------|------|
|                   |                                                      |                       | mean                    | SE   |
| Crops (total)     | 1532.6                                               |                       | 0.13                    | 0.05 |
| Cereals (total)   | 697.7                                                | Stem, sheath and leaf | 0.19                    | 0.07 |
| Rice              | 164.1                                                | Stem, sheath and leaf | 0.25                    | 0.07 |
| Wheat             | 220.4                                                | Stem, sheath and leaf | 0.16                    | 0.08 |
| Maize             | 170.4                                                | Stem, sheath and leaf | 0.16                    | 0.05 |
| Soybeans          | 103                                                  | Stem and leaf         | 0.02                    | 0.01 |
| Roots and Tubers  | 54.3                                                 | Stem and leaf         | 0.02                    | 0.01 |
| Oil-bearing crops | 62                                                   | Stem and leaf         | 0.08                    | 0.08 |
| Seed cotton       | 35.2                                                 | Stem and leaf         | 0.02                    | 0.01 |
| Sugar cane        | 25.4                                                 | Sheath and leaf       | 0.25                    | 0.07 |

<sup>a</sup>values from FAO (2012).

<sup>b</sup>estimated from phytolith and silica content data (This study; ref. [19–21,30–33]) using equation (1) and occluded-C content in phytolith of  $3 \pm 1\%$  (This study; ref. [19–21,27]).

doi:10.1371/journal.pone.0073747.t001

PhytOC content in plant organs was estimated from phytolith content data using an occluded-C content in phytolith of 2–4% (average 3%) according to the present study and references [19–21,27].

### Estimating PhytOC Production and the Phytolith C Sink

The production of PhytOC is primarily affected by plant PhytOC concentration and aboveground net primary productivity (ANPP) of Si-rich organs [34], where plant PhytOC is mainly determined by PhytOC content in phytoliths [26] and plant Si content [30,33]. This allowed the crop PhytOC production rate to be estimated from the PhytOC content and total ANPP of the Si-rich organs of an area as:

$$\text{PhytOC production rate} = \text{PhytOC content} \times \text{ANPP of Si-rich organs} \times 44/12 \quad (2)$$

where PhytOC production rate is the PhytOC production by a particular crop's Si-rich organs per year ( $\text{Tg CO}_2 \text{ yr}^{-1}$ ), PhytOC content is the concentration of PhytOC in a crop's Si-rich organs (wt %) and ANPP is the total aboveground net primary productivity of Si-rich crop organs ( $\text{Tg yr}^{-1}$ ) of an area estimated from Si-rich organ factor [35,36] and crop output [29].

As the PhytOC sequestration rate is controlled by the PhytOC production rate in plants and the stability of phytolith in environments, the phytolith C sink rate can be estimated from data of PhytOC production rate and phytolith stability factor as:

$$\text{Phytolith C sink rate} = \text{PhytOC production rate} \times \text{phytolith stability factor} \quad (3)$$

where PhytOC production rate may be estimated from equation (2) and the phytolith stability factor is assumed to be  $0.9 \pm 0.05$  as most phytoliths have been proved stable for thousands of years though some small phytolith particles containing little carbon may be partly dissolved depending on formation sites and chemical

**Table 2.** Estimated phytolith C sink produced by global farm crops in 2011.

| Farm crops              | Crop output (Tg yr <sup>-1</sup> ) <sup>a</sup> | Si-rich organ factor <sup>b</sup> | ANPP <sup>c</sup> of Si-rich organs (Tg yr <sup>-1</sup> ) <sup>c</sup> | Phytolith C sink (Tg CO <sub>2</sub> yr <sup>-1</sup> ) <sup>d</sup> |       |
|-------------------------|-------------------------------------------------|-----------------------------------|-------------------------------------------------------------------------|----------------------------------------------------------------------|-------|
|                         |                                                 |                                   |                                                                         | Mean                                                                 | SE    |
| Crops (total)           |                                                 | 1.43                              | 8091                                                                    | 26.35                                                                | 10.22 |
| Cereals (total)         | 2587                                            | 1.37                              | 3557                                                                    | 22.39                                                                | 8.41  |
| Rice                    | 723                                             | 1.1                               | 795                                                                     | 6.60                                                                 | 1.99  |
| Wheat                   | 704                                             | 1.29                              | 906                                                                     | 4.93                                                                 | 2.30  |
| Maize                   | 883                                             | 1.35                              | 1194                                                                    | 6.14                                                                 | 2.46  |
| Soybeans                | 261                                             | 1.5                               | 391                                                                     | 0.27                                                                 | 0.14  |
| Roots and Tubers        | 807                                             | 0.58                              | 468                                                                     | 0.3                                                                  | 0.17  |
| Oil-bearing crops       | 105                                             | 2.2                               | 231                                                                     | 0.59                                                                 | 0.70  |
| Seed cotton             | 77                                              | 2.91                              | 225                                                                     | 0.18                                                                 | 0.07  |
| Sugar cane <sup>e</sup> | 1794                                            | 0.18                              | 323                                                                     | 2.63                                                                 | 0.74  |

<sup>a</sup>values from FAO [29];

<sup>b</sup>mass ratios of the Si-rich organ: crop output from Huang et al. [35] and Zhu et al. [36];

<sup>c</sup>ANPP: above-ground net primary productivity;

<sup>d</sup>estimated from the crop output and Si-rich organ factor and PhytOC content in Table 1 using equations (2, 3);

<sup>e</sup>The crop output of sugar cane is fresh cane weight.

doi:10.1371/journal.pone.0073747.t002

composition of phytoliths in plant organs, and deposition environments of phytoliths after plant decay [18,25].

## Results

### Distribution of PhytOC in Dominant Arable Crops

The global area of croplands is 1532.6 10<sup>6</sup> hm<sup>2</sup>, about half of which is covered by cereals (Table 1). The PhytOC content varies

greatly among different crops (0.02–0.25%, with an average of 0.13%) (Table 1). Generally, sugar cane and cereals have higher PhytOC contents in dry biomass (0.16–0.25%) than other crops (0.02–0.08%). Within cereals, rice has higher PhytOC content in dry biomass (0.25±0.07%) than other cereal crops such as wheat (0.16±0.08%) and maize (0.16±0.05%).

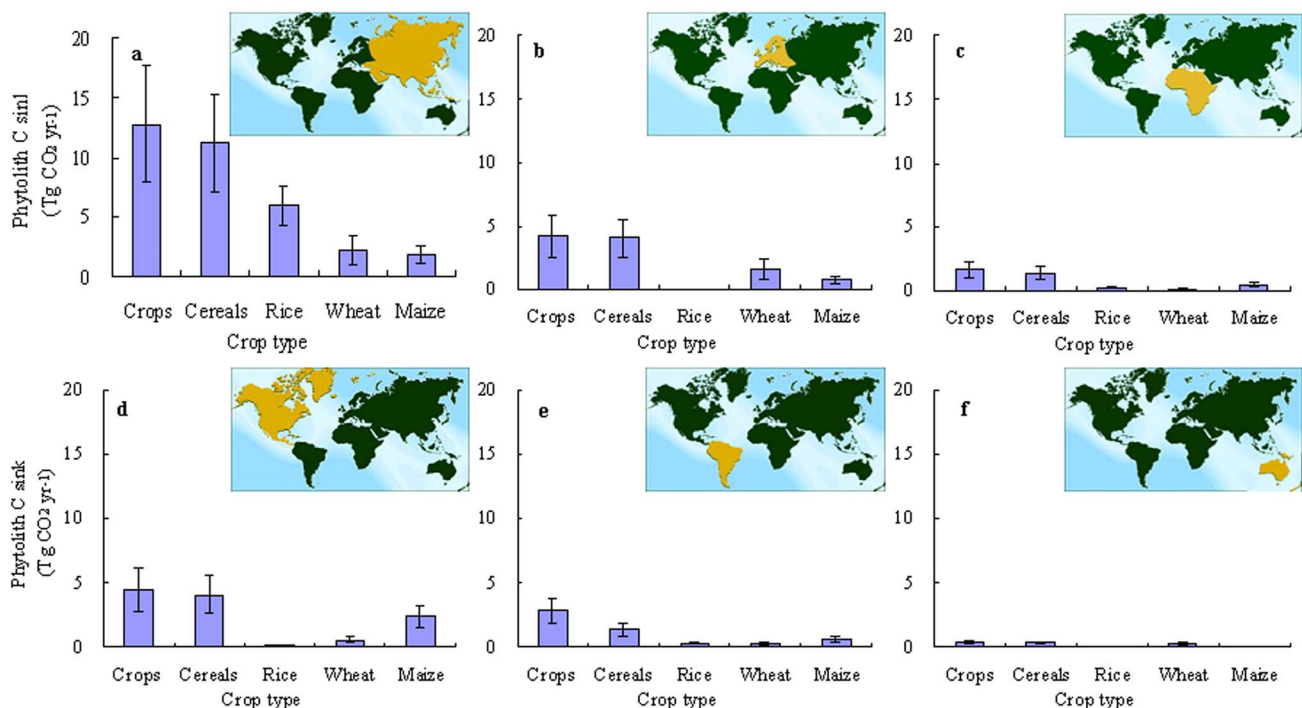

**Figure 2. Phytolith carbon sink production by farm crops from different continents in 2011.** Where **A:** Asia, **B:** Europe, **C:** Africa, **D:** North America, **E:** South America, **F:** Oceania. ‘Crops’ represents the sum of all farm crops and ‘Cereals’ represents the sum of all cereal crops including rice, wheat, maize etc.

doi:10.1371/journal.pone.0073747.g002

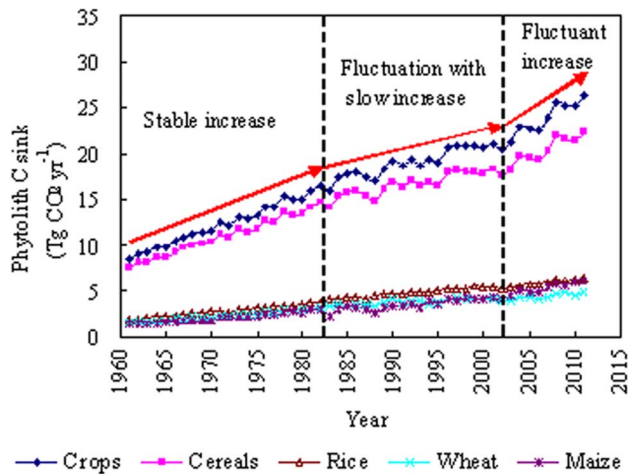

**Figure 3. Phytolith carbon sink produced by global farm crops from 1961 to 2011.** Crops include all farm crops in Table 1. Cereals include rice, wheat, maize, millet, barley and sorghum. doi:10.1371/journal.pone.0073747.g003

### Phytolith Carbon Sink of Global Croplands

The phytolith C sink varies greatly among different crops (Table 2). The phytolith C sinks generated by rice, wheat and maize ( $6.60 \pm 1.99$ ,  $4.93 \pm 2.30$  and  $6.14 \pm 2.46$  Tg CO<sub>2</sub> yr<sup>-1</sup>, respectively) are much higher than other crops. The total phytolith C sink produced by global farm crops is around  $26.35 \pm 10.22$  Tg CO<sub>2</sub> yr<sup>-1</sup>, 85% of which is contributed from cereals, including rice (25%), wheat (19%) and maize (23%).

Figure 2 displays the relative land area of the major continents and the phytolith C sink produced by farm crops in each in 2011. The largest phytolith C sinks occur in Asia ( $12.80 \pm 4.90$  Tg CO<sub>2</sub> yr<sup>-1</sup>), North America ( $4.50 \pm 1.74$  Tg CO<sub>2</sub> yr<sup>-1</sup>) and Europe ( $4.21 \pm 1.66$  Tg CO<sub>2</sub> yr<sup>-1</sup>), which account for 49, 17 and 16% of the total global croplands, respectively.

The total phytolith C sink of global croplands has tripled since 1961 (Figure 3). In general, the evolution of the phytolith C sink since 1961 may be divided into three stages:

- (1) 1961–1982: the total phytolith C sink increased steadily from 8.61 to 16.57 Tg CO<sub>2</sub> yr<sup>-1</sup>.
- (2) 1983–2002: the total phytolith C sink fluctuated, with a slow increase from 15.99 to 20.51 Tg CO<sub>2</sub> yr<sup>-1</sup>.
- (3) 2003–2011: the total phytolith C sink increased, with some fluctuation, from 21.14 to 26.35 Tg CO<sub>2</sub> yr<sup>-1</sup>.

## Discussion

### Contribution of Phytolith C Sink to Global Cropland C Balance

By comparing phytolith C sink data and the global cropland soil C balance during 1961–2100, the contribution of the phytolith C sink to the net global cropland C balance was estimated (Table 3). Ruddiman [37] estimated that the emission from land-use conversion during the postindustrial era (i.e. 200 years), using  $0.8$  Gt C yr<sup>-1</sup> (or  $2.93$  Pg CO<sub>2</sub> yr<sup>-1</sup>), at  $160$  Gt C (or  $587$  Pg CO<sub>2</sub>). Using an average soil C sink rate of  $-2.93$  Pg CO<sub>2</sub> yr<sup>-1</sup> during 1961–2015, the total soil C sink is about  $-161.2$  Pg CO<sub>2</sub>. Lal [6,14] estimated a high and attainable soil C sequestration potential of  $0.55$  Gt C yr<sup>-1</sup> (or  $2.02$  Pg CO<sub>2</sub> yr<sup>-1</sup>) for global croplands assuming judicious land use and recommended management practices (RMPs) were taken world-wide. Taking an average soil C sink rate of  $2.02$  Pg CO<sub>2</sub> yr<sup>-1</sup> during 2016–2100, the total soil C sink is about  $171.7$  Pg CO<sub>2</sub>. The total net soil C sink of global croplands during 1961–2100 is about  $10.6$  Pg CO<sub>2</sub>. Taking an average phytolith C sink rate of  $0.03$  Pg CO<sub>2</sub> yr<sup>-1</sup>, the total phytolith C sink of global croplands during 1961 and 2100 is  $4.2 \pm 1.9$  Pg CO<sub>2</sub> yr<sup>-1</sup>,  $40 \pm 18\%$  of the total net soil C sink (Table 3).

### Enhancing Phytolith Carbon Sink through the Optimization of Cropping System and Fertilization

Carbon sink trading has been carried out in many fields [38]. If phytolith carbon sink can be measured exactly, we believe that the sink may also be traded to increase the income of farmers. Therefore, in the future, farmers will be optimising carbon sequestration besides increasing yields.

Regional analysis of crop structures and farm productivity (FAO, 2012) suggests that the high phytolith C sinks in Asia, North America and Europe are due to the relatively wide production of rice, maize and wheat, respectively. The rapid increase of total phytolith C sink since 1961 has been due to cropland expansion and increase in the cereal yield per unit area as a result of fertilizer application and irrigation.

Although the global cropland area is difficult to increase significantly in the near future, the findings of the study suggest that the present global cropland phytolith carbon sink could be further enhanced through the optimization of cropping system and fertilization (Table 4).

Cropping system optimization measures include enhancement of cereal area percentage in croplands and enhancement of multi-cropping index (Table 4). For example, Parr and Sullivan [20] and Li et al. [19] revealed that the enhancement of rice and wheat area percentage in croplands might significantly increase the total phytolith C sink in croplands because of their higher phytolith contents than other crops with low costs. Enhancement of multi-

**Table 3. Contribution of the phytolith C sink to the global cropland C balance for 1961–2100.**

| Period                                           | Phytolith C     | Soil C                  |                         | Phytolith C contribution (%) |             |
|--------------------------------------------------|-----------------|-------------------------|-------------------------|------------------------------|-------------|
|                                                  | 1961–2100       | 1961–2015 <sup>a)</sup> | 2016–2100 <sup>b)</sup> | 1961–2100                    | 1961–2100   |
| Sink rate (Pg CO <sub>2</sub> yr <sup>-1</sup> ) | $0.03 \pm 0.01$ | -2.93                   | 2.02                    | 0.08                         | $40 \pm 18$ |
| Total sink (Pg CO <sub>2</sub> )                 | $4.2 \pm 1.9$   | -161.2                  | 171.7                   | 10.6                         | $40 \pm 18$ |

Sinks are positive values and sources are negative values.

<sup>a)</sup>the average soil C sink rate data of 1961–2015 are after Ruddiman [37].

<sup>b)</sup>the average soil C sink rate data of 2016–2100 are after Lal [6,14] assuming judicious land use and recommended management practices (RMPs) are applied worldwide during 2016–2100.

doi:10.1371/journal.pone.0073747.t003

**Table 4.** Potential measures to enhance global cropland phytolith carbon sink.

| Types                           | Measures                                      | Mechanisms                                  | Comments                                                          |
|---------------------------------|-----------------------------------------------|---------------------------------------------|-------------------------------------------------------------------|
| Optimization of cropping system | Enhancement of cereal percentage in croplands | Enhancing crop output and phytolith content | High efficiency in all croplands with low costs                   |
|                                 | Enhancement of multi-cropping index           | Enhancing crop output                       | High efficiency in all croplands with low costs                   |
| Fertilization                   | Silicon fertilizer application                | Enhancing crop phytolith content            | High efficiency in cereal croplands and sugarcane with high costs |
|                                 | Rock powder amendment                         | Enhancing crop phytolith content            | High efficiency in cereal croplands and sugarcane with low costs  |
|                                 | Organic mulching                              | Enhancing crop output and phytolith content | High efficiency in cereal croplands and sugarcane with low costs  |
|                                 | Traditional fertilization                     | Enhancing crop output                       | High efficiency with high costs                                   |

doi:10.1371/journal.pone.0073747.t004

cropping index may significantly increase the total cropland phytolith C sink by enhancing crop output with low costs.

Fertilization measures include silicon fertilizer application, rock powder amendment, organic mulching, and traditional fertilization (Table 4). Silicon fertilizer application, rock powder amendment and organic mulching will increase soil bioavailable silicon input, plant silicon uptake and phytolith content for cereals and sugarcane [5,19]. Traditional fertilization (N, P, K fertilizer application) may also increase total phytolith C sink in croplands by enhancing crop output.

Although the potential measures proposed for promoting cropland phytolith C sink based on the study are meritable, more data is required. The exact efficiency and costs of the proposed measures need further assessment before practical measures may be implemented to sequester globally-significant amounts of atmospheric CO<sub>2</sub>.

## Conclusions

Relative to the liable biomass C sink, the phytolith C sink in croplands is certain and stable, and can be sustained for several hundreds or thousands of years in most regions of the world. The phytolith sink of global croplands is a stable net sink of

26.35±10.22 Tg CO<sub>2</sub> yr<sup>-1</sup>, and may play a significant role in global cropland C balance for 1961–2100. The high phytolith sinks in Asia, North America and Europe can be attributed to the relatively high production of rice, maize, and wheat, respectively. The total phytolith C sink of global croplands has tripled since 1961 mainly due to fertilization, irrigation and cropland expansion. Taking an average phytolith C sink rate of 0.03 Pg CO<sub>2</sub> yr<sup>-1</sup>, the total phytolith C sink of global croplands during 1961 and 2100 is 4.2±1.9 Pg CO<sub>2</sub> yr<sup>-1</sup>, 40±18% of the total net soil C sink. Our data suggest that the cropland phytolith C sinks may be further enhanced by adopting cropland management practices such as optimization of cropping system and fertilization.

## Acknowledgments

We thank Mr. David Cushley of ISE for language editing.

## Author Contributions

Conceived and designed the experiments: ZLS JFP. Performed the experiments: ZLS FSG. Analyzed the data: ZLS. Contributed reagents/materials/analysis tools: ZLS. Wrote the paper: ZLS JFP FSG.

## References

- Cao M, Woodward FI (1998) Dynamic responses of terrestrial ecosystem carbon cycling to global climate change. *Nature* 393: 249–252.
- Heimann M, Reichstein M (2008) Terrestrial ecosystem carbon dynamics and climate feedbacks. *Nature* 451: 289–292.
- Piao S, Fang J, Ciais P, Peylin P, Huang Y, et al. (2009) The carbon balance of terrestrial ecosystems in China. *Nature* 458: 1008–1013.
- Pan Y, Birdsey RA, Fang J, Houghton R, Kauppi PE, et al. (2011) A large and persistent carbon sink in the world's forests. *Science* 333: 988–993.
- Song ZL, Wang HL, Strong PJ, Li ZM, Jiang PK (2012a) Plant impact on the coupled terrestrial biogeochemical cycles of silicon and carbon: Implications for biogeochemical carbon sequestration. *Earth-Sci Rev* 155, 319–331.
- Lal R (2004a) Soil carbon sequestration impacts on global climate change and food security. *Science* 304: 1623–1627.
- Houghton RA (1995) Changes in the storage of terrestrial carbon since 1850. In: Lal R, Kimble JM, Levine E, Stewart BA (Eds.), *Soils and Global Change*. CRC/Lewis, Boca Raton, FL, pp. 45–65.
- Houghton RA (1999) The annual net flux of carbon to the atmosphere from changes in land use 1850 to 1990. *Tellus* 50B: 298–313.
- Houghton RA, Hackler JL, Lawrence KT (1999) The U.S. carbon budget: contributions from land-use change. *Science* 285: 574–578.
- Schimel DS (1995) Terrestrial ecosystems and the carbon cycle. *Global Change Biol* 1: 77–91.
- Intergovernmental Panel on Climate Change (IPCC) (2001) *Climate Change: The Scientific Basis*. Cambridge Univ Press, Cambridge, UK.
- Smith PC (2004) Carbon sequestration in croplands: the potential in Europe and the global context. *Eur J Agron* 20: 229–236.
- Lal R (2001) Managing world soils for food security and environmental quality. *Adv Agron* 71: 155–192.
- Lal R (2004b) Soil carbon sequestration to mitigate climate change. *Geoderma* 123: 1–22.
- Six J, Ogle SM, Jay breidt F, Conant RT, Mosier AR, et al. (2004) The potential to mitigate global warming with no-tillage management is only realized when practised in the long term. *Global Change Biol* 10: 155–160.
- Siever R, Scott RA (1963) Organic geochemistry of silica, in: Berger IA (Ed.), *Organic Geochemistry*. Pergamon Press, Elmsford, NY, pp. 579–595.
- Piperno DR (1988) *Phytolith Analysis: An Archaeological and Geological Perspective*. Academic Press, London.
- Parr JF, Sullivan LA (2005) Soil carbon sequestration in phytoliths. *Soil Biol Biochem* 37: 117–124.
- Li ZM, Song ZL, Parr JF, Wang HL (2013) Occluded C in rice phytoliths: implications to biogeochemical carbon sequestration. *Plant Soil*. Published online first. DOI: 10.1007/s11104-013-1661-9.
- Parr JF, Sullivan LA (2011) Phytolith occluded carbon and silica variability in wheat cultivars. *Plant Soil* 342: 165–171.
- Zuo X, Lü H (2011) Carbon sequestration within millet phytoliths from dry-farming of crops in China. *Chinese Sci Bull* 56: 3451–3456.
- Parr JF, Sullivan LA, Quirk R (2009) Sugarcane phytoliths: Encapsulation and sequestration of a long-lived carbon fraction. *Sugar Tech* 11: 17–21.
- Wilding LP (1967) Radiocarbon dating of biogenetic opal. *Science* 156: 66–67.
- Mullholland SC, Prior C (1992) Processing of phytoliths for radiocarbon dating by AMS. *Phytolitharien Newsletter* 7: 7–9.

25. Meunier JD, Colin F, Alarcon C (1999) Biogenic silica storage in soils. *Geology* 27: 835–838.
26. Song ZL, Liu HY, Si Y, Yin Y (2012b) The production of phytoliths in the grasslands of China: implications to biogeochemical sequestration of atmospheric CO<sub>2</sub>. *Global Change Biol* 18: 3647–3653.
27. Parr JF, Sullivan LA, Chen B, Ye G, Zheng W (2010) Carbon bio-sequestration within the phytoliths of economic bamboo species. *Global Change Biol* 16: 2661–2667.
28. Jansson C, Wulfschleger SD, Kalluri UC, Tuskan GA (2010) Phytosequestration: Carbon biosequestration by plants and the prospects of genetic engineering. *BioScience* 60: 685–696.
29. Food and Agriculture Organization of the United Nations. FAO (2012): Statistics. Available: <http://faostat.fao.org/site/567/default.aspx#ancor>, from 1961 to 2011.
30. Hou X (1982) *Vegetation Geography of China and Chemical Composition of its Dominant Plants*, Science Press, Beijing, pp. 188–243.
31. Xu X, Yang L, Dong Y (1998) *Rice field ecosystem in China*. China Agriculture Press.
32. Zhou Q, Li Y, Lin J, Ye Y, Yang L (2005) Effects of irrigation on the vascular bundle structures and contents of silicon, magnesium and zinc in leaves of two sugarcane varieties. *Sugar Crops of China* (in Chinese with English abstract) 2: 1–4.
33. Ding TP, Tian SH, Sun L, Wu LH, Zhou JX et al. (2008) Silicon isotope fractionation between rice plants and nutrient solution and its significance to the study of the silicon cycle. *Geochim Cosmochim Acta* 72: 5600–5615.
34. Blecker SW, McCulley RL, Chadwick OA, Kelly EF (2006) Biologic cycling of silica across a grassland bioclimate sequence. *Global Biogeochem Cy* 20: 1–11.
35. Huang Y, Zhang W, Sun WJ, Zheng XH (2007) Net primary production of Chinese croplands from 1950 to 1999. *Ecol Appl* 17: 692–701.
36. Zhu J, Li R, Yang X (2012) Spatial and temporal distribution of crop straw resources in 30 years in China. *Journal of Northwest A & F University* (in Chinese with English abstract) 40: 139–145.
37. Ruddiman WF (2003) The anthropogenic greenhouse era began thousands of years ago. *Climate Change* 61: 261–293.
38. Fang J, Chen A, Peng C, Zhao S, Ci L (2001) Changes in forest biomass carbon storage in China between 1949 and 1998. *Science* 292: 2320–2323.
